# Supplementary material for: NF1+/ex42del miniswine model the cellular disruptions and behavioral presentations of NF1‐associated cognitive and motor impairment
Source: PubMed Central journal article supplement — Clin Transl Sci. 2024 Jun 26;17(6):e13858. doi: 10.1111/cts.13858 (PMC11208292; doi:10.1111/cts.13858), 2024-06-26
Supplement: CTS-17-e13858-s001.pdf [file CTS-17-e13858-s001.pdf]

**Table S1. Description of specific cNF presentation in each *NFI<sup>+/-ex42del</sup>* Yucatan miniswine.**

| Animal ID | Sex | DOB       | Age Tumor Initiation | Path Group | Tumor Description                       | Tumor Size                         | 11M Gait | 15M Gait | 18M Gait | 12M Tmaze | 18M Tmaze |
|-----------|-----|-----------|----------------------|------------|-----------------------------------------|------------------------------------|----------|----------|----------|-----------|-----------|
| A4407     | M   | 31-Mar-17 | NA                   | 14M        | no growth                               |                                    |          |          |          |           |           |
| A4464     | M   | 4-Apr-17  | NA                   | 14M        | no growth                               |                                    |          |          |          |           |           |
| A5599     | M   | 18-Oct-17 | NA                   | 14M        | no growth                               |                                    |          |          |          |           |           |
| A6159     | M   | 18-Nov-17 | NA                   | 14M        | small inflamed lesion-(non-tumor)       |                                    |          |          |          |           |           |
| A4404     | M   | 29-Mar-17 | NA                   | 18M        | no growth                               |                                    |          |          |          |           |           |
| A5464     | M   | 11-Sep-17 | NA                   | 18M        | no growth                               |                                    |          |          |          |           |           |
| A5465     | M   | 11-Sep-17 | 12M                  | 18M        | Bump-middle of spine-Diffuse NF         | 2 cm in diameter;<br>raised 0.5 cm |          | T        | T        | T         | T         |
| A5476     | M   | 12-Sep-17 | 12.5M                | 18M        | Small Bump - R. shoulder-Diffuse NF     |                                    |          | T        | T        | T         | T         |
| A5601     | M   | 18-Oct-17 | 11.5M                | 18M        | Small bump - back L of spine-Diffuse NF | 3 cm in diameter;<br>raised 0.5 cm | T        | T        | T        | T         | T         |
| A5603     | M   | 18-Oct-17 | 17M                  | 18M        | Small bump- Back R. side-Diffuse NF     | 1cm in diameter;<br>raised 0.5 cm  |          |          | T        |           | T         |
| A5725     | M   | 7-Nov-17  | 9M                   | 18M        | Two small bumps- R. shoulder-Diffuse NF | 2 cm diameter - raised<br>0.5-1 cm | T        | T        | T        | T         | T         |
| A6173     | M   | 20-Nov-17 | 9M                   | 18M        | Bump, back L. side- Diffuse NF          | 6-7 cm diameter;<br>raised 2 cm    | T        |          |          |           |           |

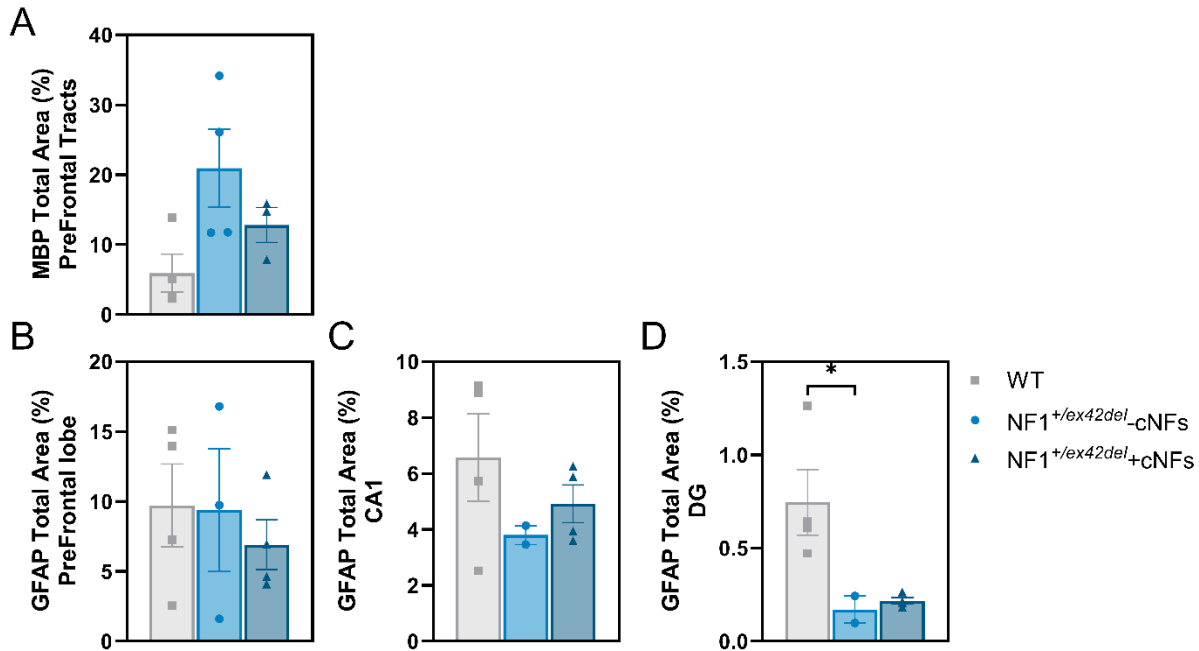

**Figure S1. Inconsistent MBP<sup>+</sup> mature oligodendrocytes expression and GFAP<sup>+</sup> astrocyte expression in prefrontal lobe and hippocampus in male *NF1*<sup>+/ex42del</sup> miniswine with cNFs burden at 18 months of age.** A. MBP<sup>+</sup> analysis in prefrontal tracts indicating no significant differences between *NF1*<sup>+/ex42del</sup> miniswine with or without cNF burden and wild type counterparts at 18 months of age. B. GFAP<sup>+</sup> analysis of prefrontal tracts indicating no significant difference regardless of cNF burden in male *NF1*<sup>+/ex42del</sup> miniswine at 18 months of age. C. GFAP<sup>+</sup> analysis of the CA1 region of the hippocampus indicating no significant difference regardless of cNF burden in male *NF1*<sup>+/ex42del</sup> miniswine at 18 months of age. D. GFAP<sup>+</sup> analysis of the dentate gyrus indicating a decrease in male *NF1*<sup>+/ex42del</sup> miniswine with no cNF burden at 18 months of age. n=3-4 *NF1*<sup>+/ex42del</sup> +cNFs; n=2-4 *NF1*<sup>+/ex42del</sup> -cNFs; n=3-4 WT. One-way ANOVA, Tukey post-hoc. \*p<0.05, \*\*p<0.01, \*\*\*p≤0.001. Mean ± SEM.

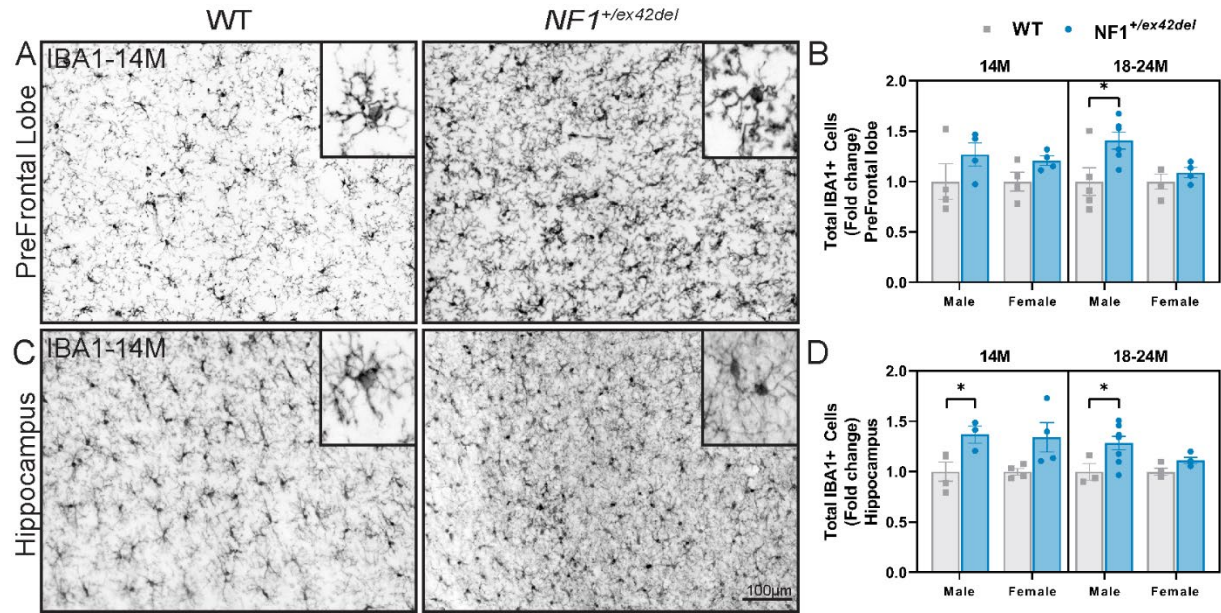

**Figure S2. Increased Iba1<sup>+</sup> microglia in prefrontal lobe and hippocampus of *NF1<sup>+/ex42del</sup>***

**miniswine.** A. Representative images of Iba1<sup>+</sup> microglia in prefrontal lobe of 14-month-old wild type and *NF1<sup>+/ex42del</sup>* miniswine. B. Iba1<sup>+</sup> analysis of prefrontal lobe indicating significant increase in 18-month-old male *NF1<sup>+/ex42del</sup>* miniswine. C. Representative images of Iba1<sup>+</sup> microglia in the hippocampus of 14-month-old animals. D. Iba1<sup>+</sup> analysis of hippocampus sustained increase in the number of microglia in 14- and 18-month-old male *NF1<sup>+/ex42del</sup>* miniswine. Unpaired t-tests. n=3-4/group, \*p<0.05. Mean ± SEM. Scale bar=100µm.

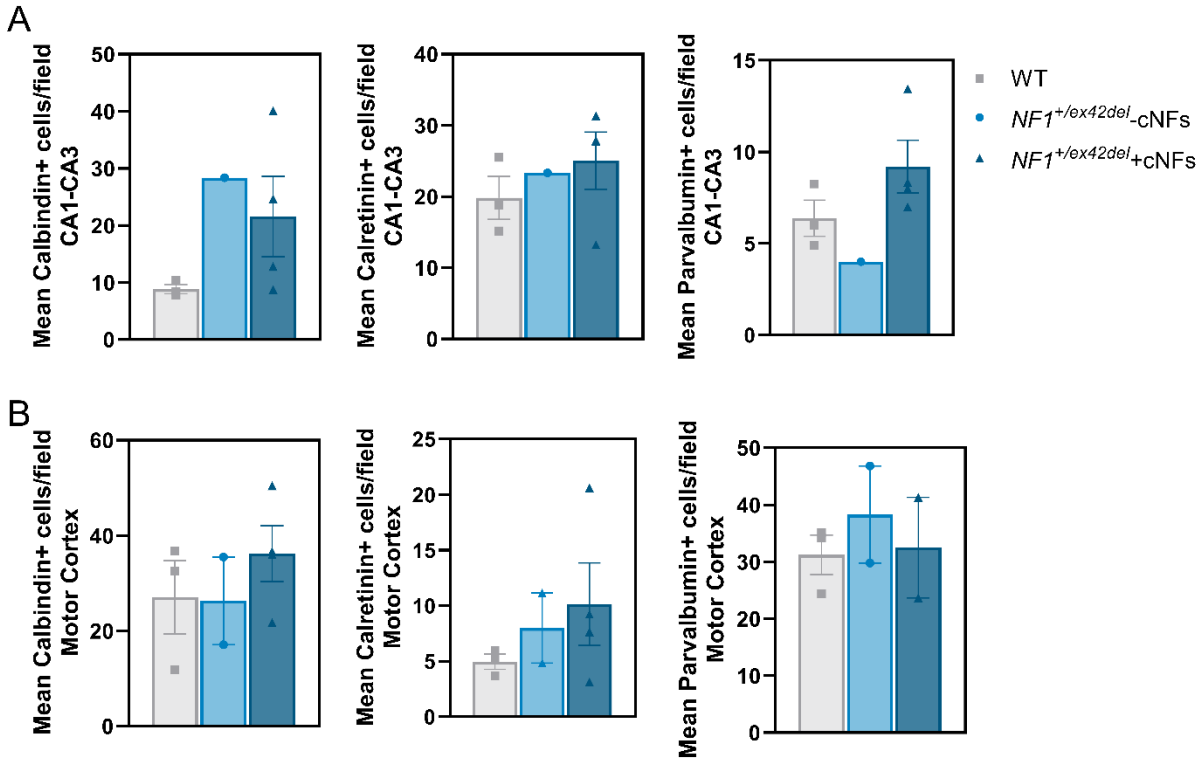

**Figure S3. No consistent differences in GABAergic interneurons in hippocampus or motor cortex of male  $NF1^{+/ex42del}$  miniswine with and without cNF burden at 18 months of age. A.**

Calbindin<sup>+</sup>, calretinin<sup>+</sup>, and parvalbumin<sup>+</sup> interneuron analysis in hippocampus indicating no significant difference of male  $NF1^{+/ex42del}$  miniswine with and without cNFs and wild type

miniswine at 18 months of age. B. Calbindin<sup>+</sup>, calretinin<sup>+</sup>, and parvalbumin<sup>+</sup> interneuron analysis

in motor cortex indicating no significant difference of male  $NF1^{+/ex42del}$  miniswine with and

without cNFs and wild type miniswine at 18 months of age. n=2-3  $NF1^{+/ex42del}$  +cNFs; n=1-2

$NF1^{+/ex42del}$  -cNFs; n=2-3 WT. One-way ANOVA, Tukey post-hoc. Mean ± SEM.

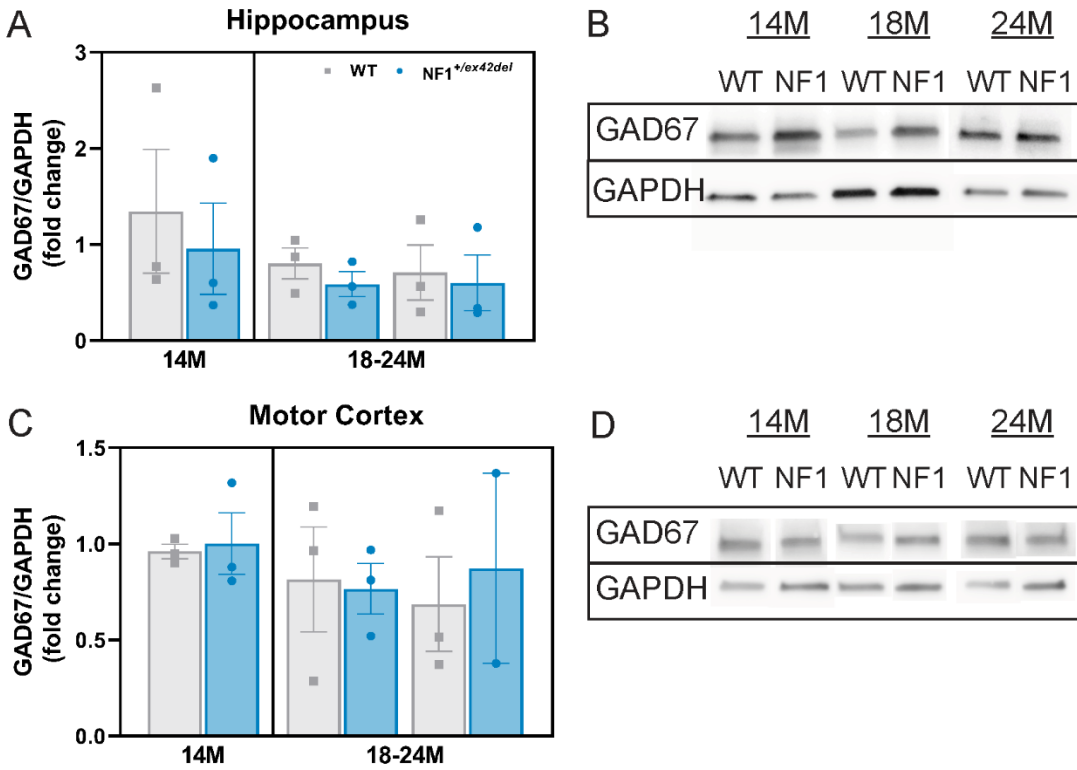

**Figure S4. No differences in protein expression of GAD67.** A. Fold change of GAD67 over GAPDH indicates no significant differences in GAD67 expression in the hippocampus of *NF1<sup>+/ex42del</sup>* miniswine compared to wild type counterparts. B. Representative western blot of GAD67 over GAPDH as loading control in wild type and *NF1<sup>+/ex42del</sup>* miniswine at 14, 18, and 24 months of age in the hippocampus. C. Fold change of GAD67 over GAPDH indicates no significant differences in GAD67 expression in the motor cortex of *NF1<sup>+/ex42del</sup>* miniswine compared to wild type counterparts. D. Representative western blot of GAD67 over GAPDH as loading control in wild type and *NF1<sup>+/ex42del</sup>* miniswine at 14, 18, and 24 months of age in the motor cortex. Unpaired t-tests. n=3/group. Mean ± SEM.

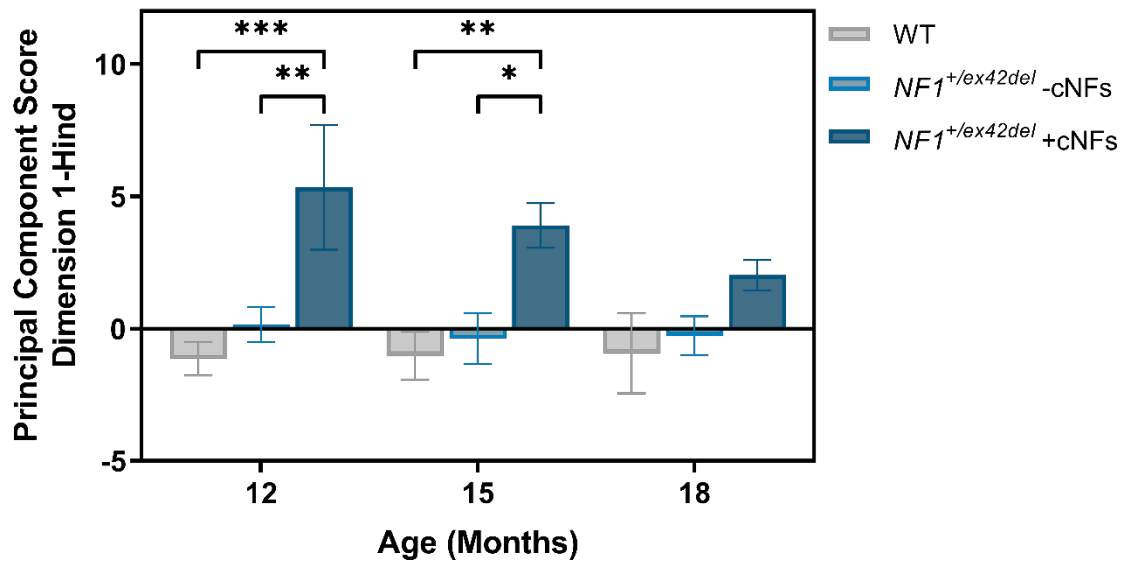

**Figure S5. Male *NF1*<sup>+/ex42del</sup> miniswine with cNFs have a significantly different hind gait than wild type.** Principal component score of most significant variables indicates that male *NF1*<sup>+/ex42del</sup> miniswine with cNFs have significant hind gait abnormalities at 12 and 15 months of age. PCA implemented in R utilizing the FactorMineR package. n=3-4 *NF1*<sup>+/ex42del</sup> +cNFs; n=6-22 *NF1*<sup>+/ex42del</sup> -cNFs; n=7-17 WT. One-way ANOVA, Tukey post-hoc. \*p<0.05, \*\*p<0.01, \*\*\*p<0.001. Mean ± SEM.
